# Supplementary material for: MHC class II is a functional receptor for H3N2 Influenza A viruses and mediates host-specificity
Source: Research Square preprint supplement (doi:10.21203/rs.3.rs-6278351/v1), 2025-05-02

**MHC class II is a functional receptor for H3N2 Influenza A viruses and mediates host-specificity.**

Matias Cardenas1, Sasha Compton1, C. Joaquin Caceres1, †, Adolfo García-Sastre2,3,4,5,6,7, Daniel R. Perez1 and Daniela S. Rajao1, *

1 Department of Population Health, College of Veterinary Medicine, University of Georgia, Athens GA

2 Department of Microbiology, Icahn School of Medicine at Mount Sinai, New York, NY, USA

3 Global Health and Emerging Pathogens Institute, Icahn School of Medicine at Mount Sinai, New York, NY, USA

4 Department of Medicine, Division of Infectious Diseases, Icahn School of Medicine at Mount Sinai, New York, NY, USA

5 Tisch Cancer Institute, Icahn School of Medicine at Mount Sinai, New York, NY, USA

6 Department of Department of Pathology, Molecular and Cell-Based Medicine, Icahn School of Medicine at Mount Sinai, New York, NY, USA

7 Icahn Genomics Institute, Icahn School of Medicine at Mount Sinai, New York, NY, USA

† Current address:Department of Veterinary Microbiology and Preventive Medicine, College of Veterinary Medicine, Iowa State University, Ames, IA, USA.

*Corresponding author: [daniela.rajao@uga.edu](mailto:daniela.rajao@uga.edu)

**Supplementary Table 1. Primers used in this study.**

| **Primer** |  | **Sequence (5’-3’)** |
| --- | --- | --- |
| HLA_DRA | F | GGAATTCCATGGCCATAAGTGG |
| R | GAAGATCTTCTTACAGAGGCCC |
| HLA_DRB1 | F | GGAATTCCATGGTGTGTCTGAAG |
| R | GAAGATCTTCTCAGCTCAGGAATC |
| SLA_DRA | F | GGAATTCCATGACCATACTTGGG |
| R | GAAGATCTTCTCACAGAGGCC |
| SLA_DRB1 | F | GGAATTCCATGTTGCATCTGTG |
| R | GAAGATCTTCTCAGCTCAGGAGG |
| M_titration | F | AGATGAGTCTTCTAACCGAGGTC |
| R | TGCAAAGACACTTTCCAGTCTCTG |
| P | GGCCCCCTCAAAGCCGA |

**Supplementary Fig 1. Neuraminidase treatment is not cytotoxic and efficiently removes SA form PAMs.**

**
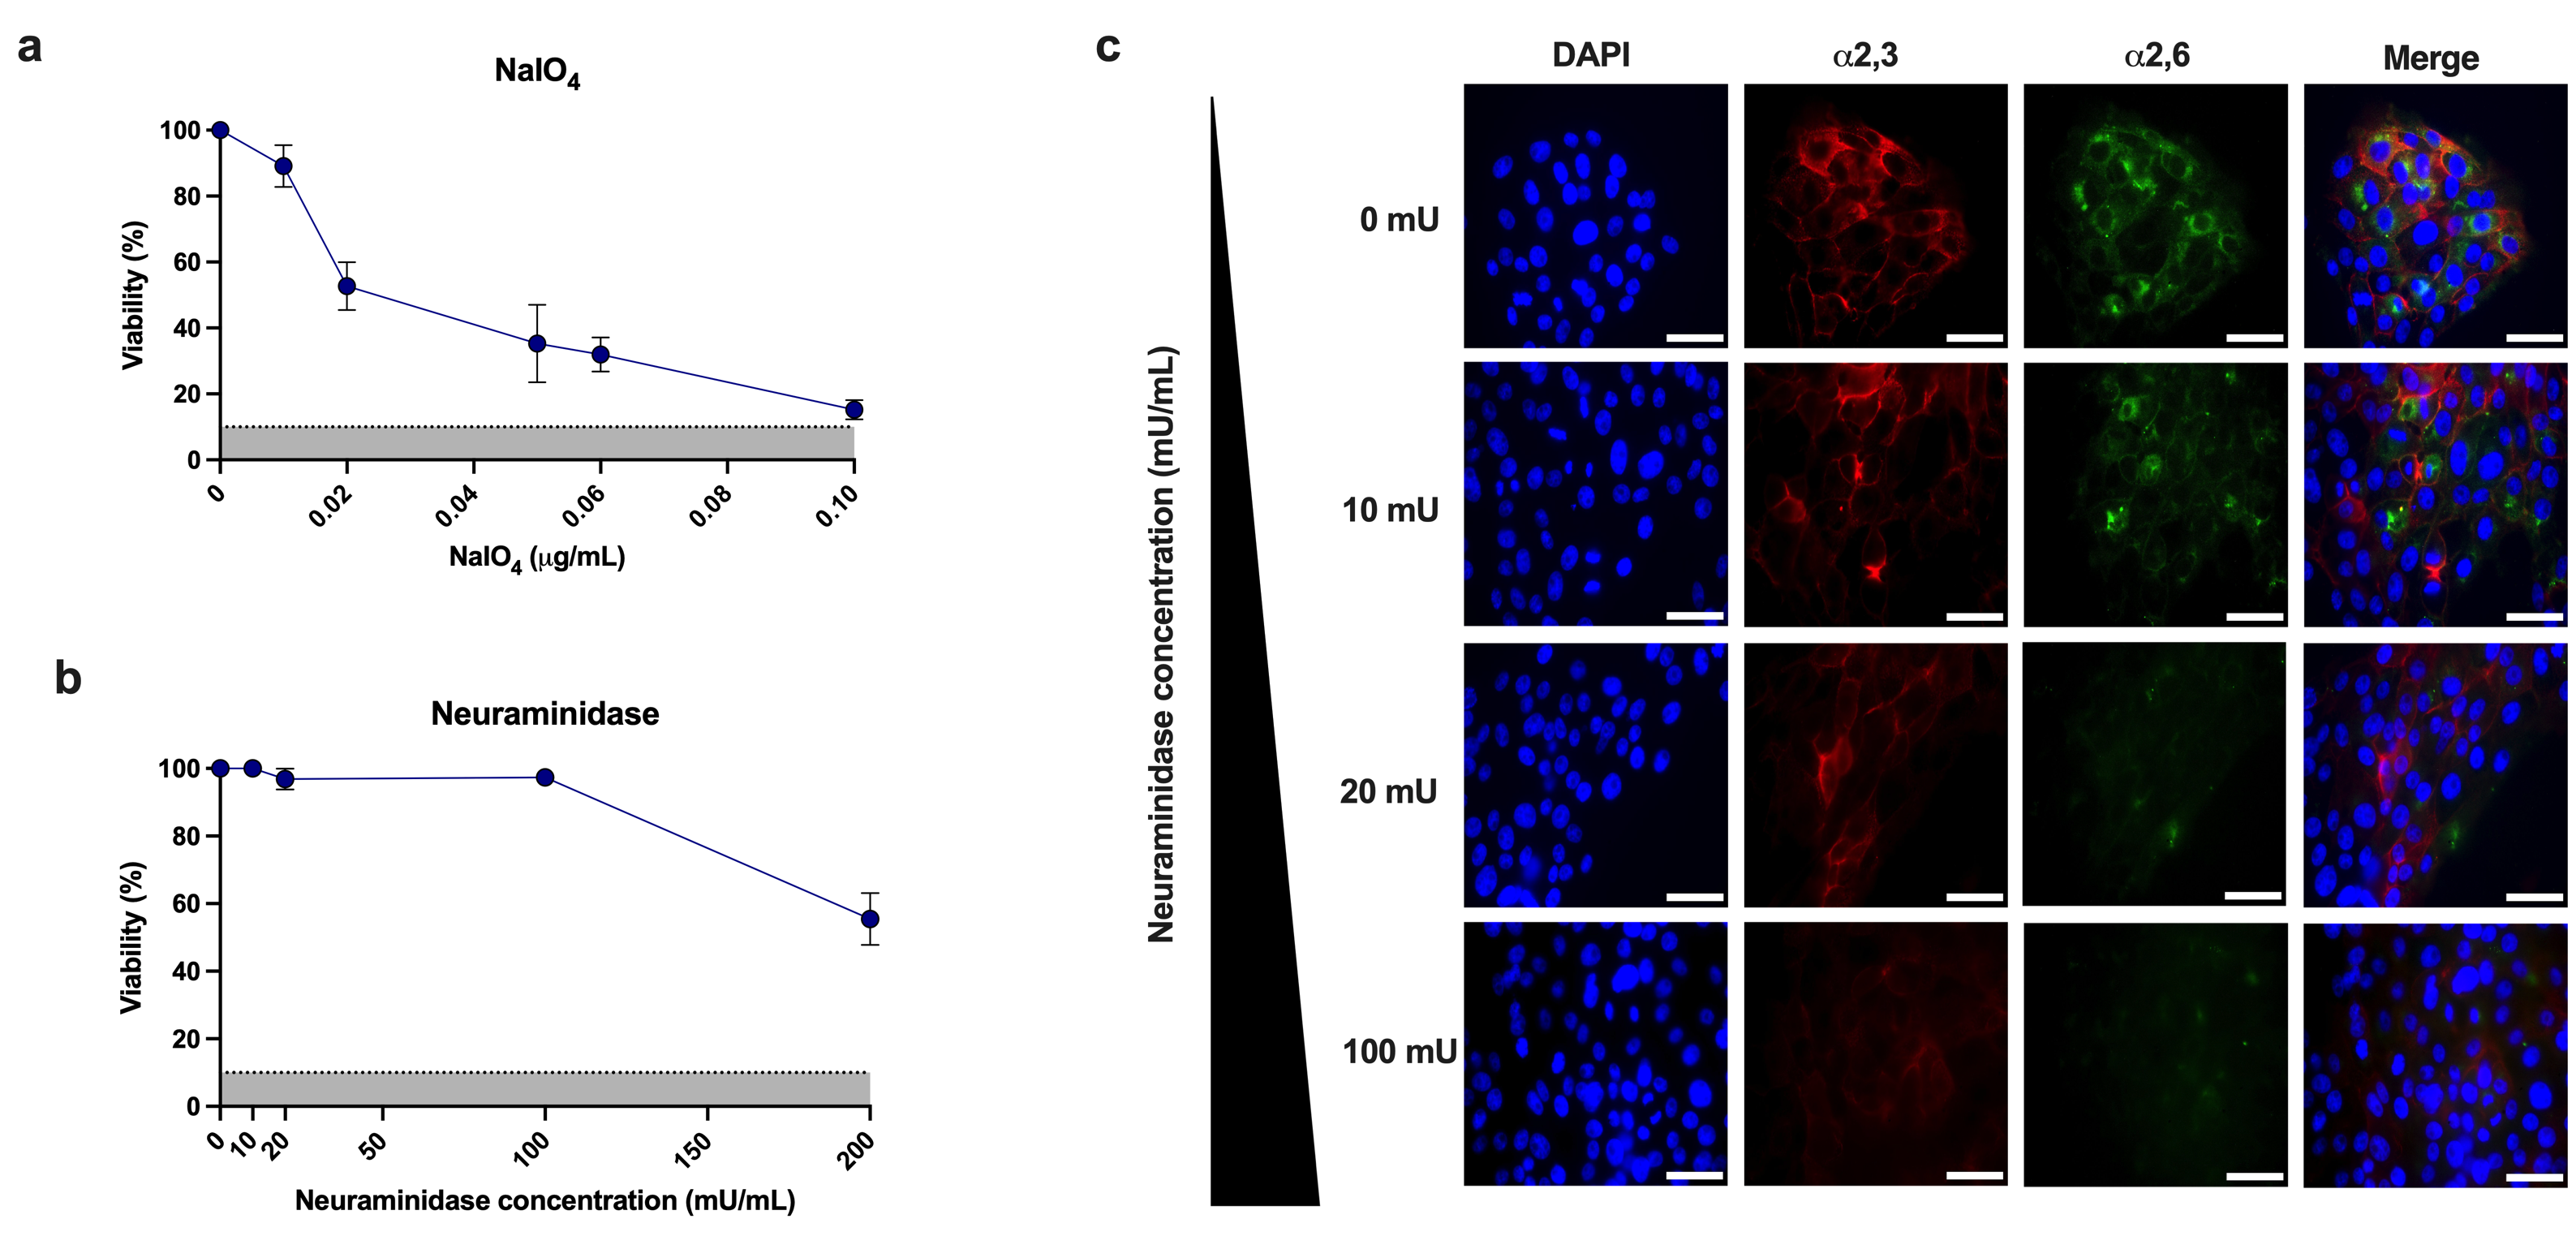
**

**Supplementary Fig 2. Transfection of HEK-293T with MHCII-encoding plasmid yields high levels of MHCII expression.**


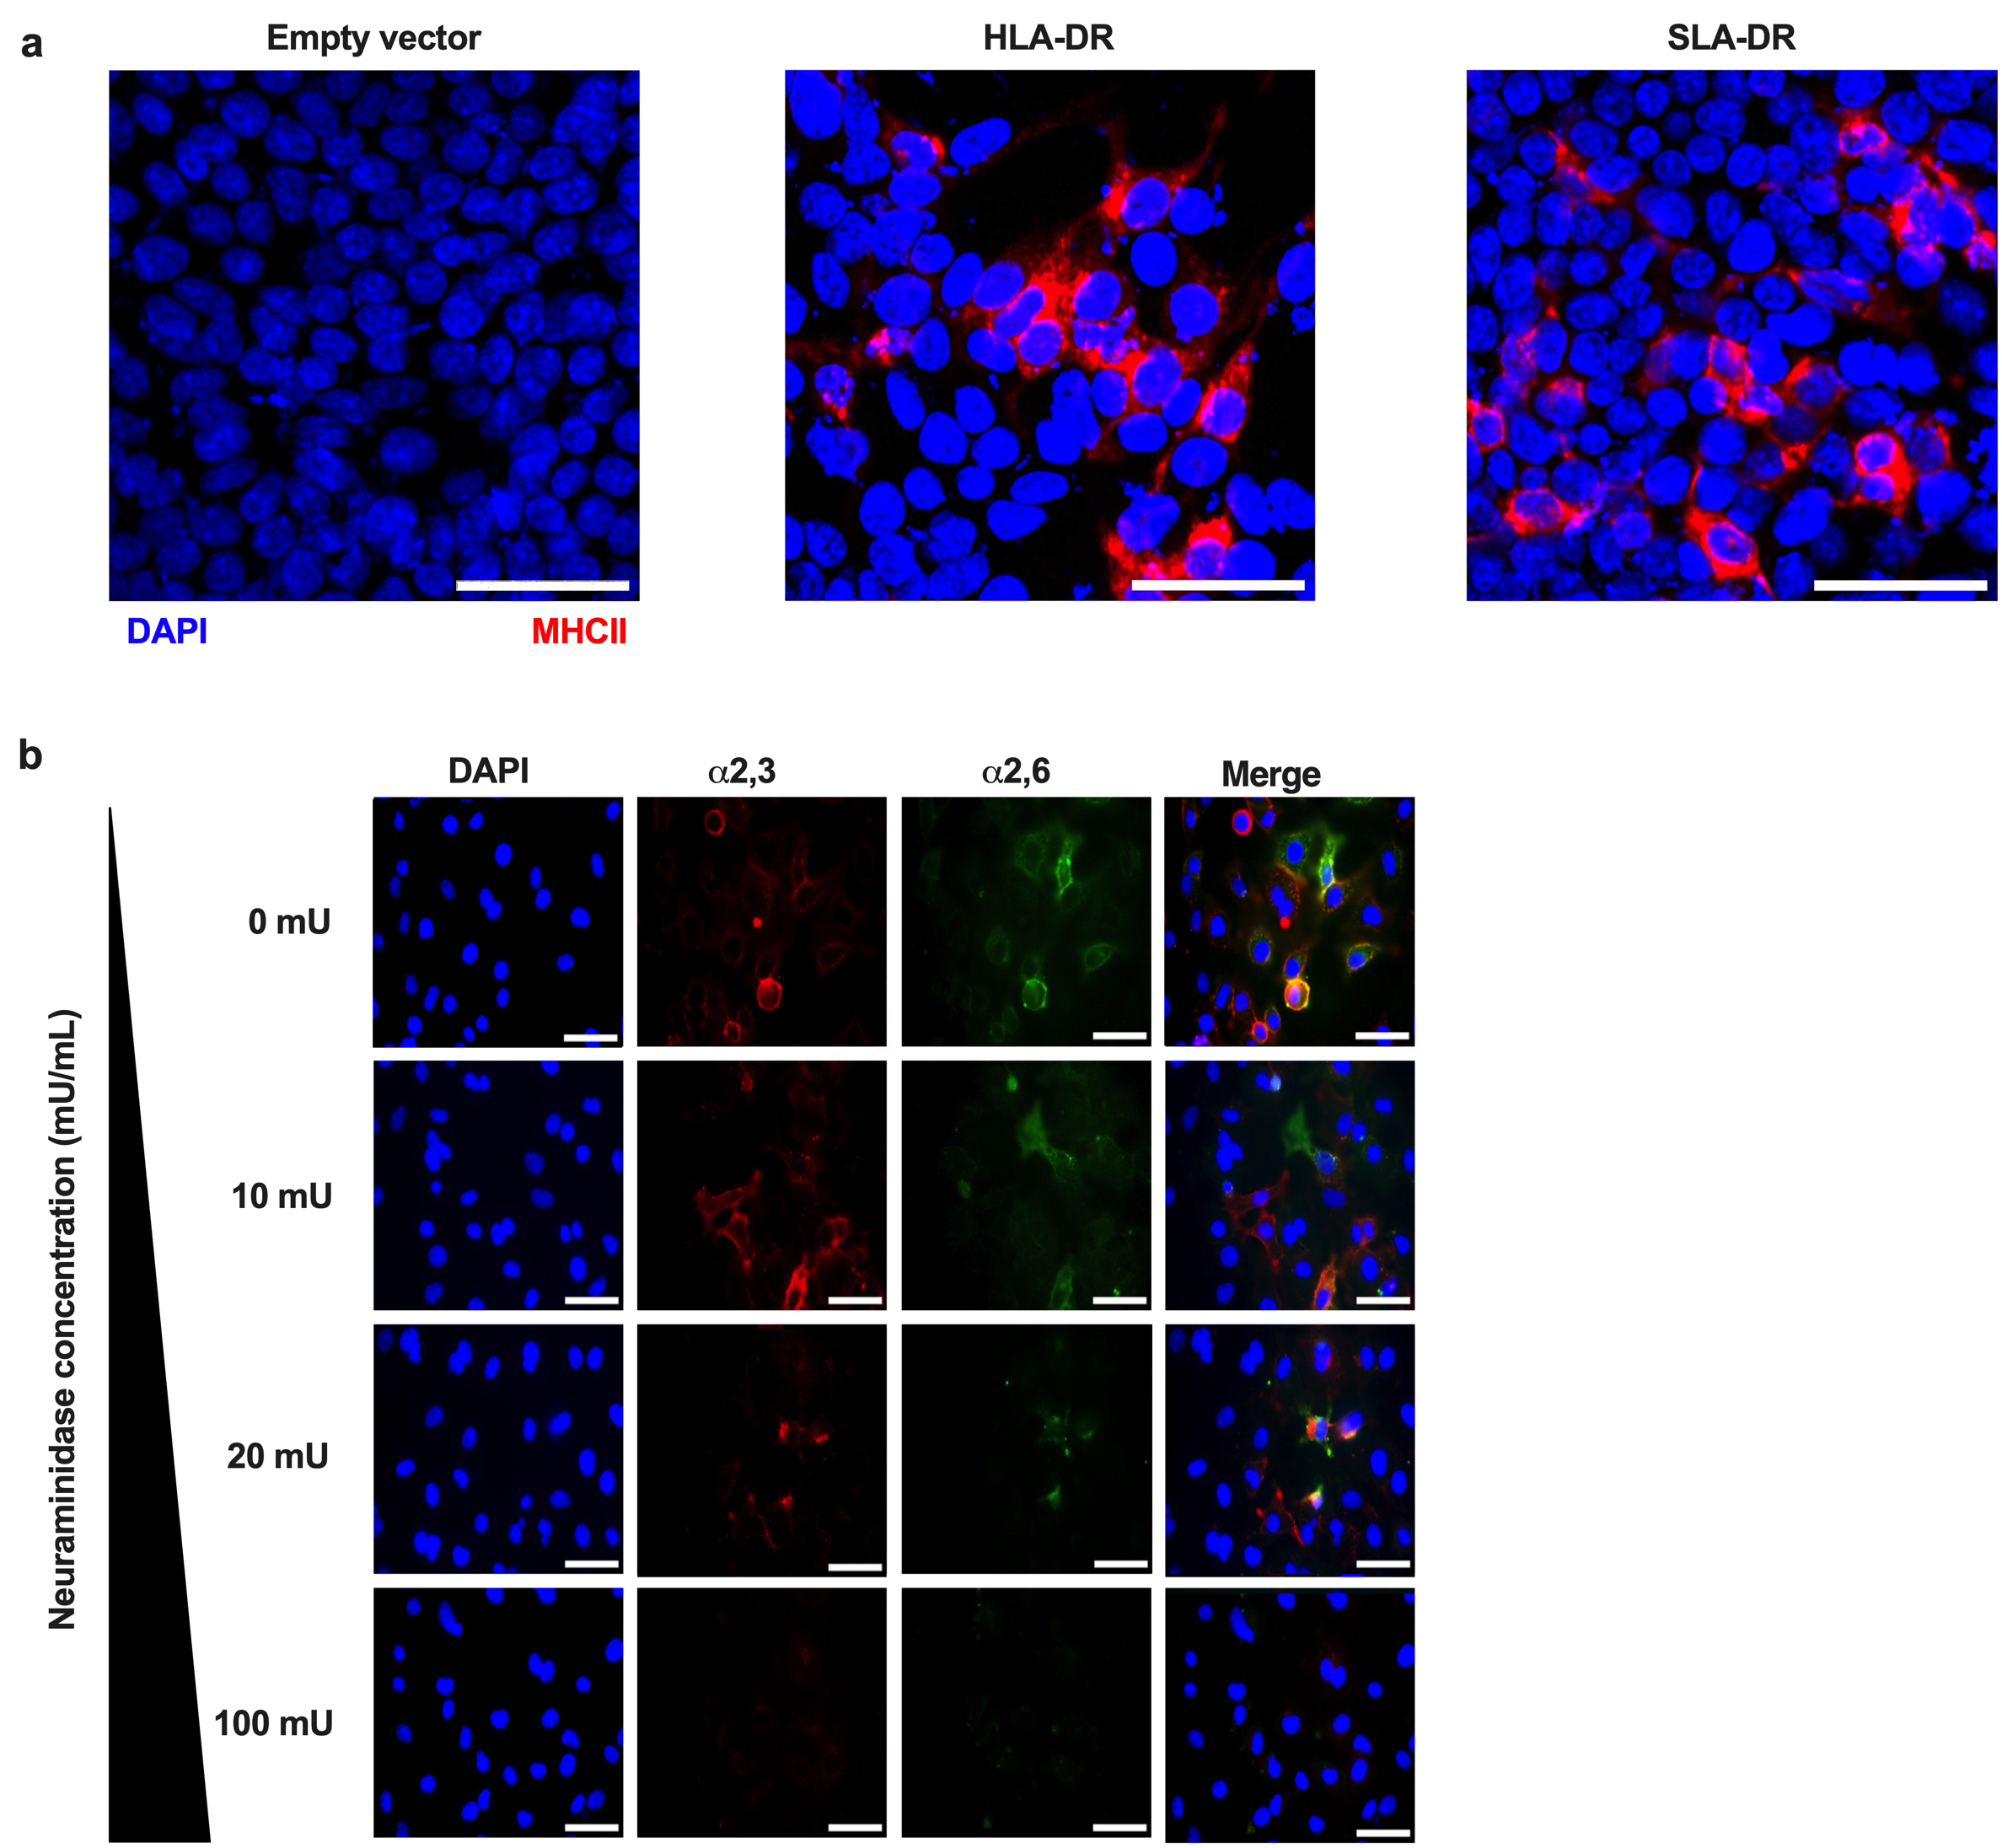


**Supplementary Fig 3. Infection of deacetylated cells lead to the infection of MHCII+ cells only.**


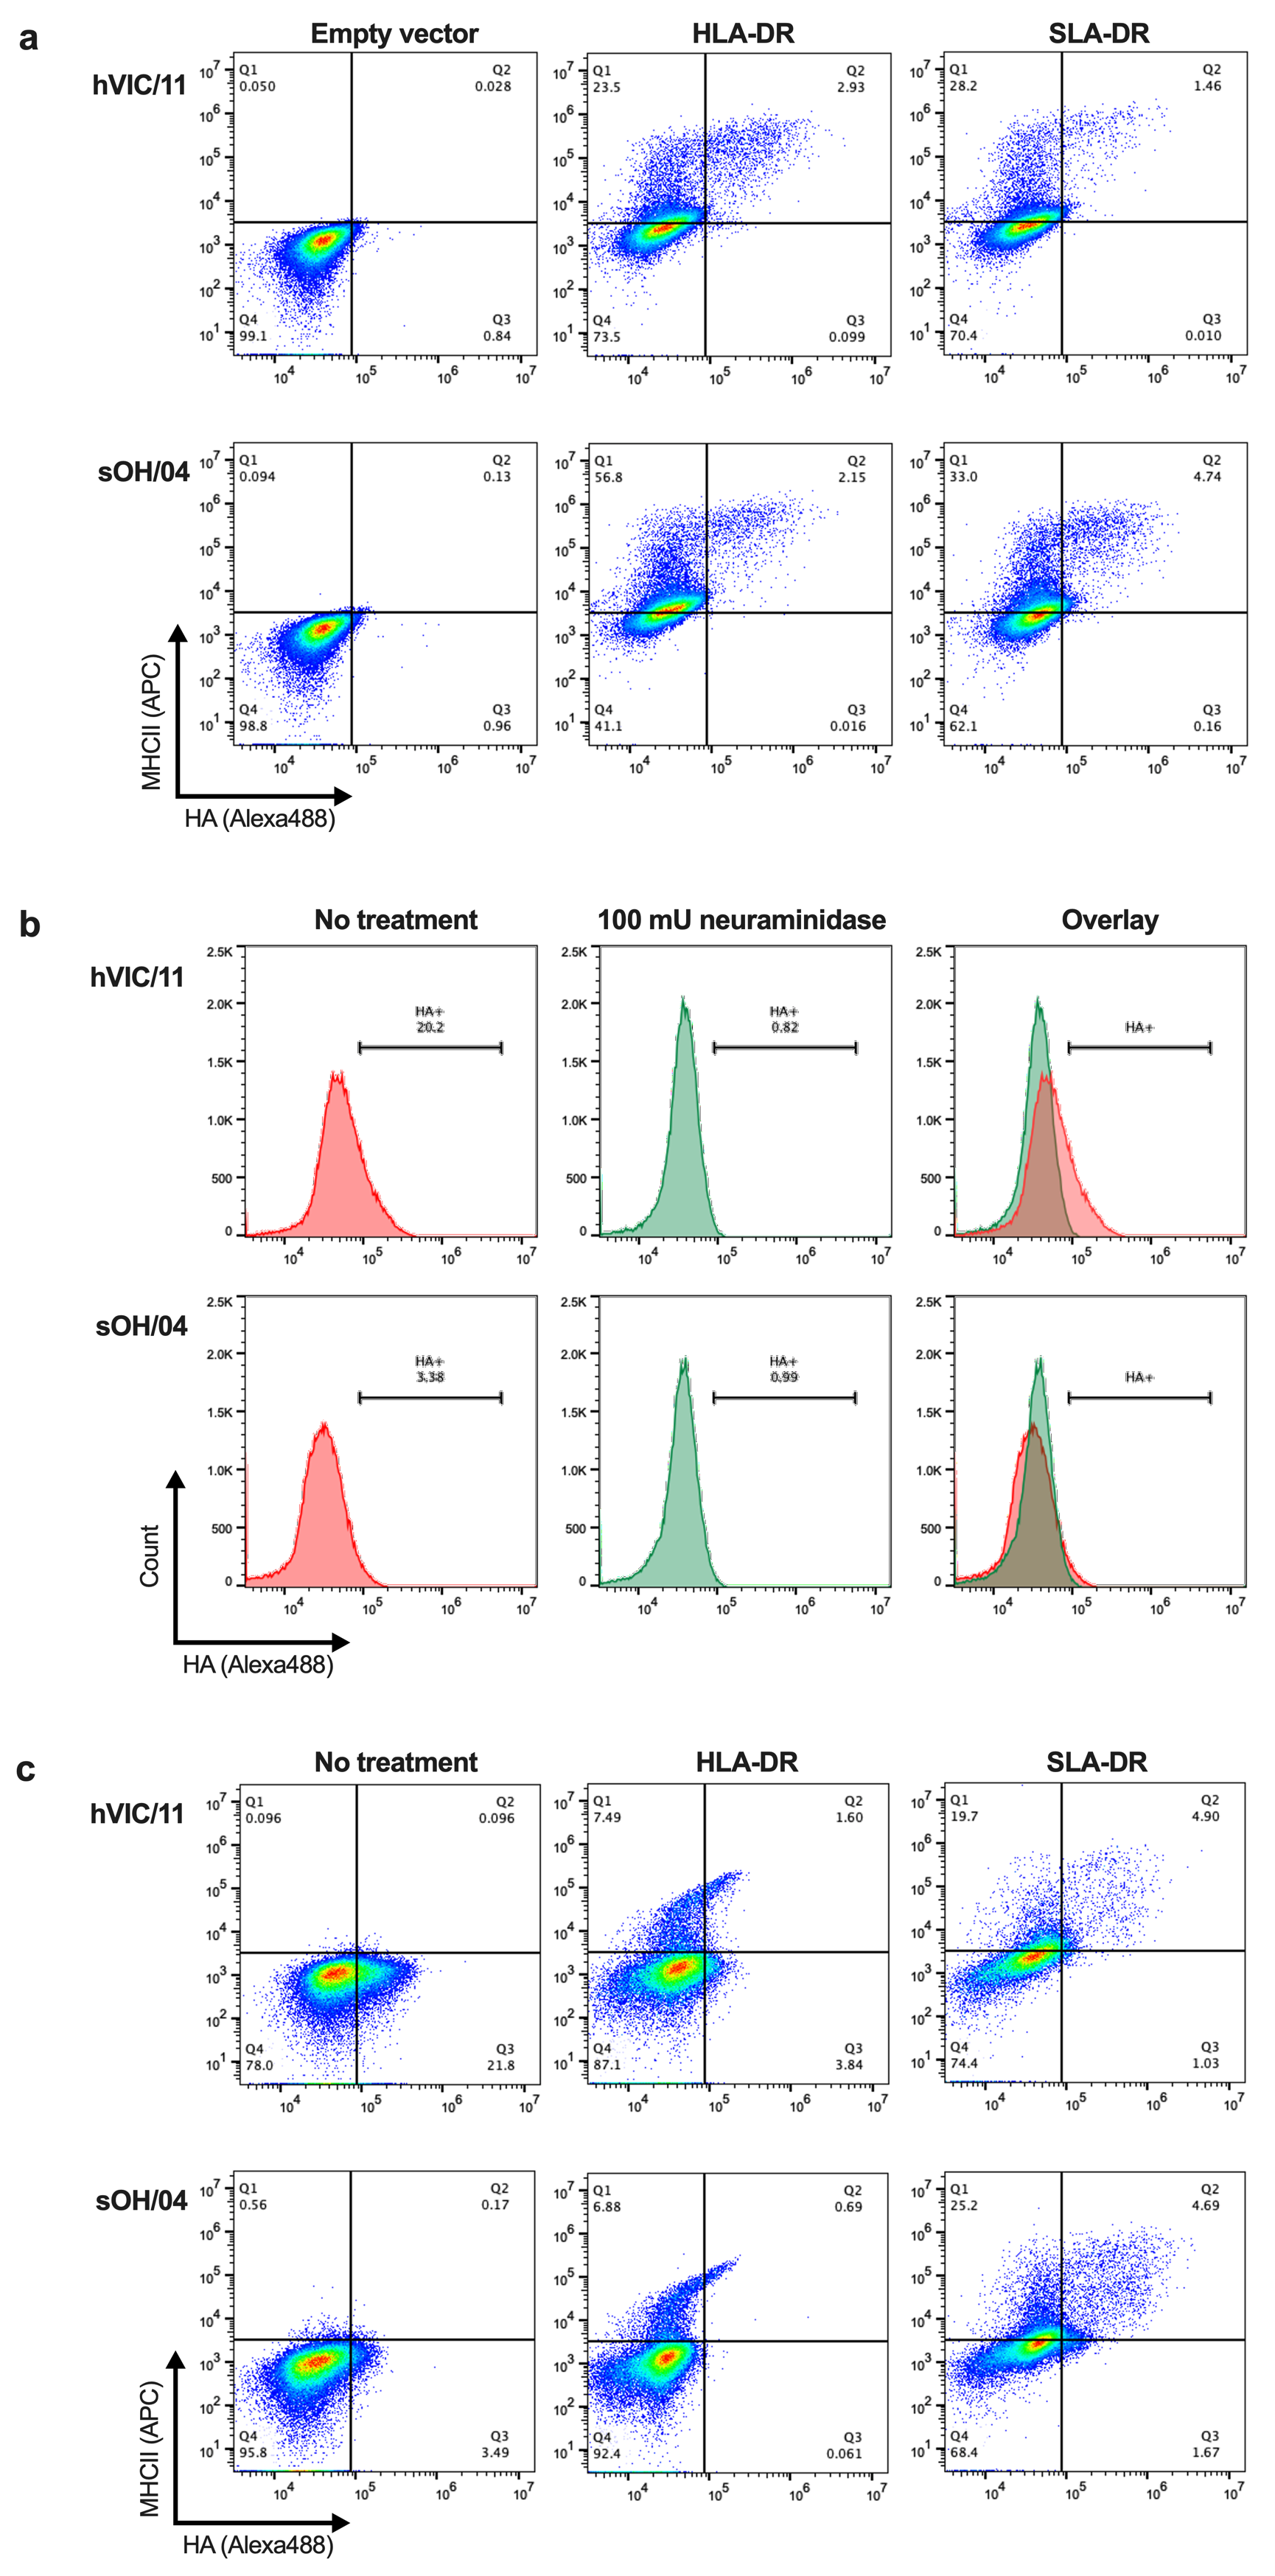


**Supplementary Fig 4.**

**
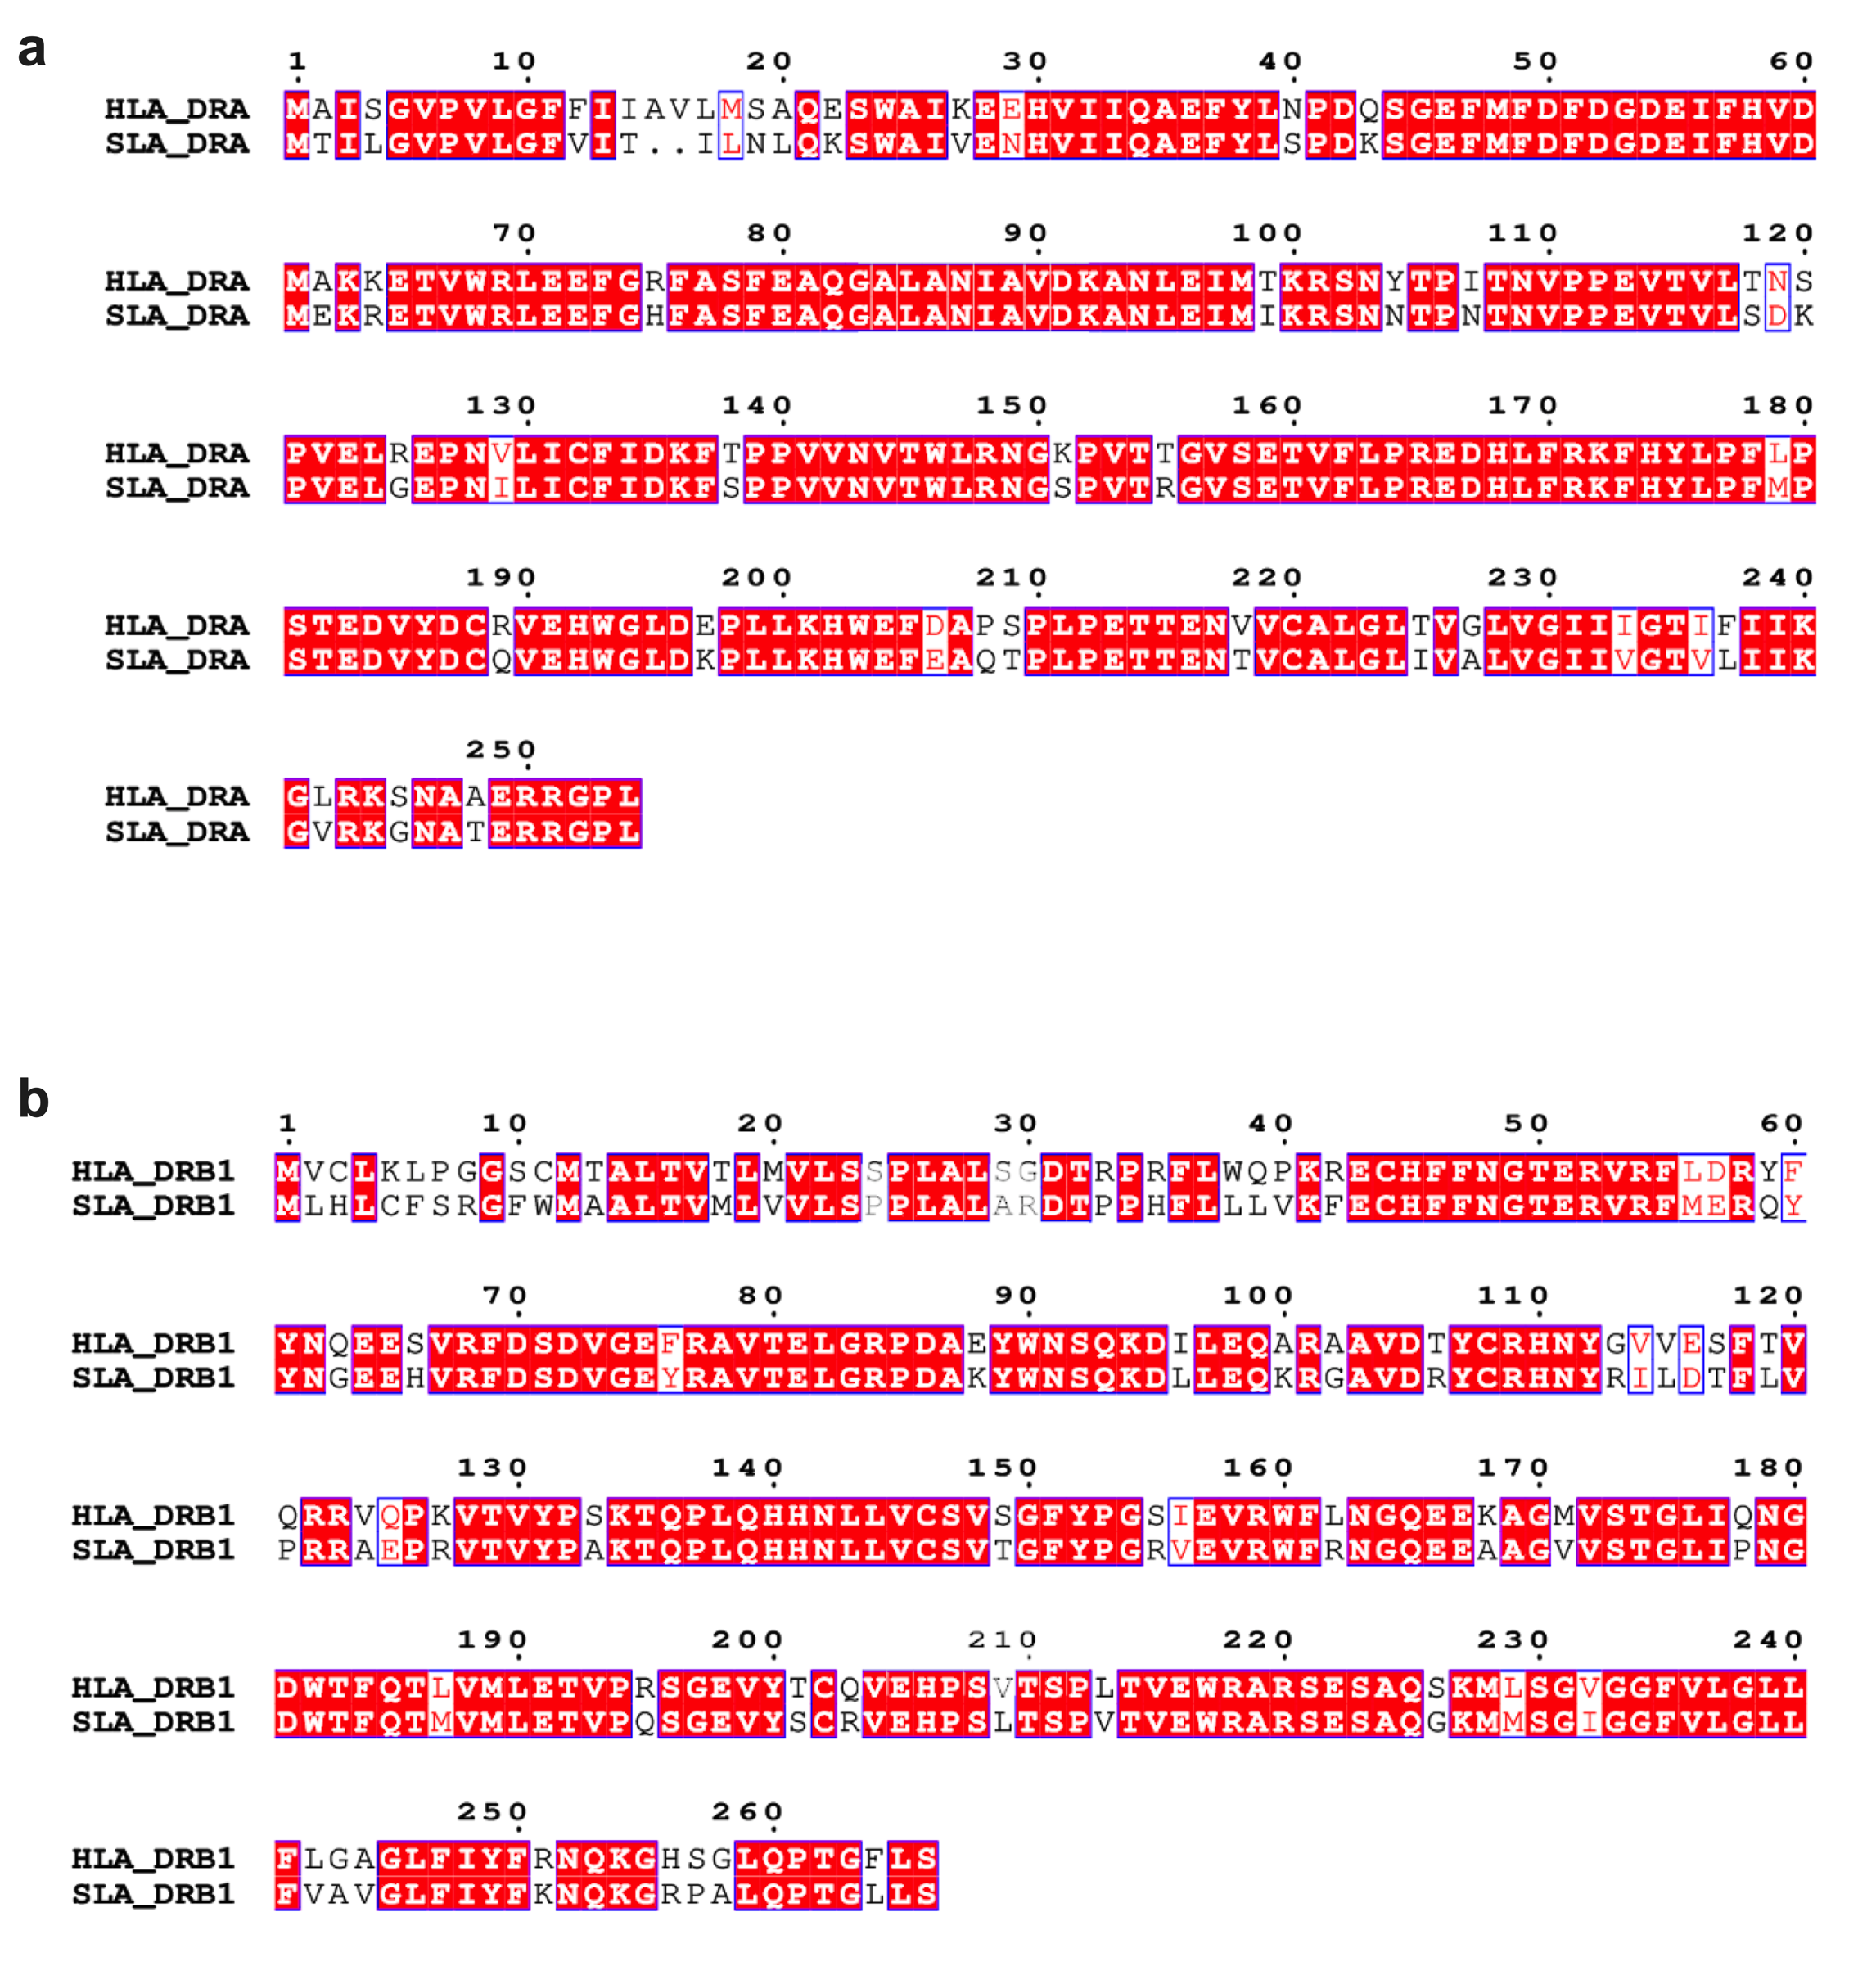
**

**Supplementary Fig 5. The pandemic 2009 H1N1 virus cannot infect deacetylated MHCII+ cells.**


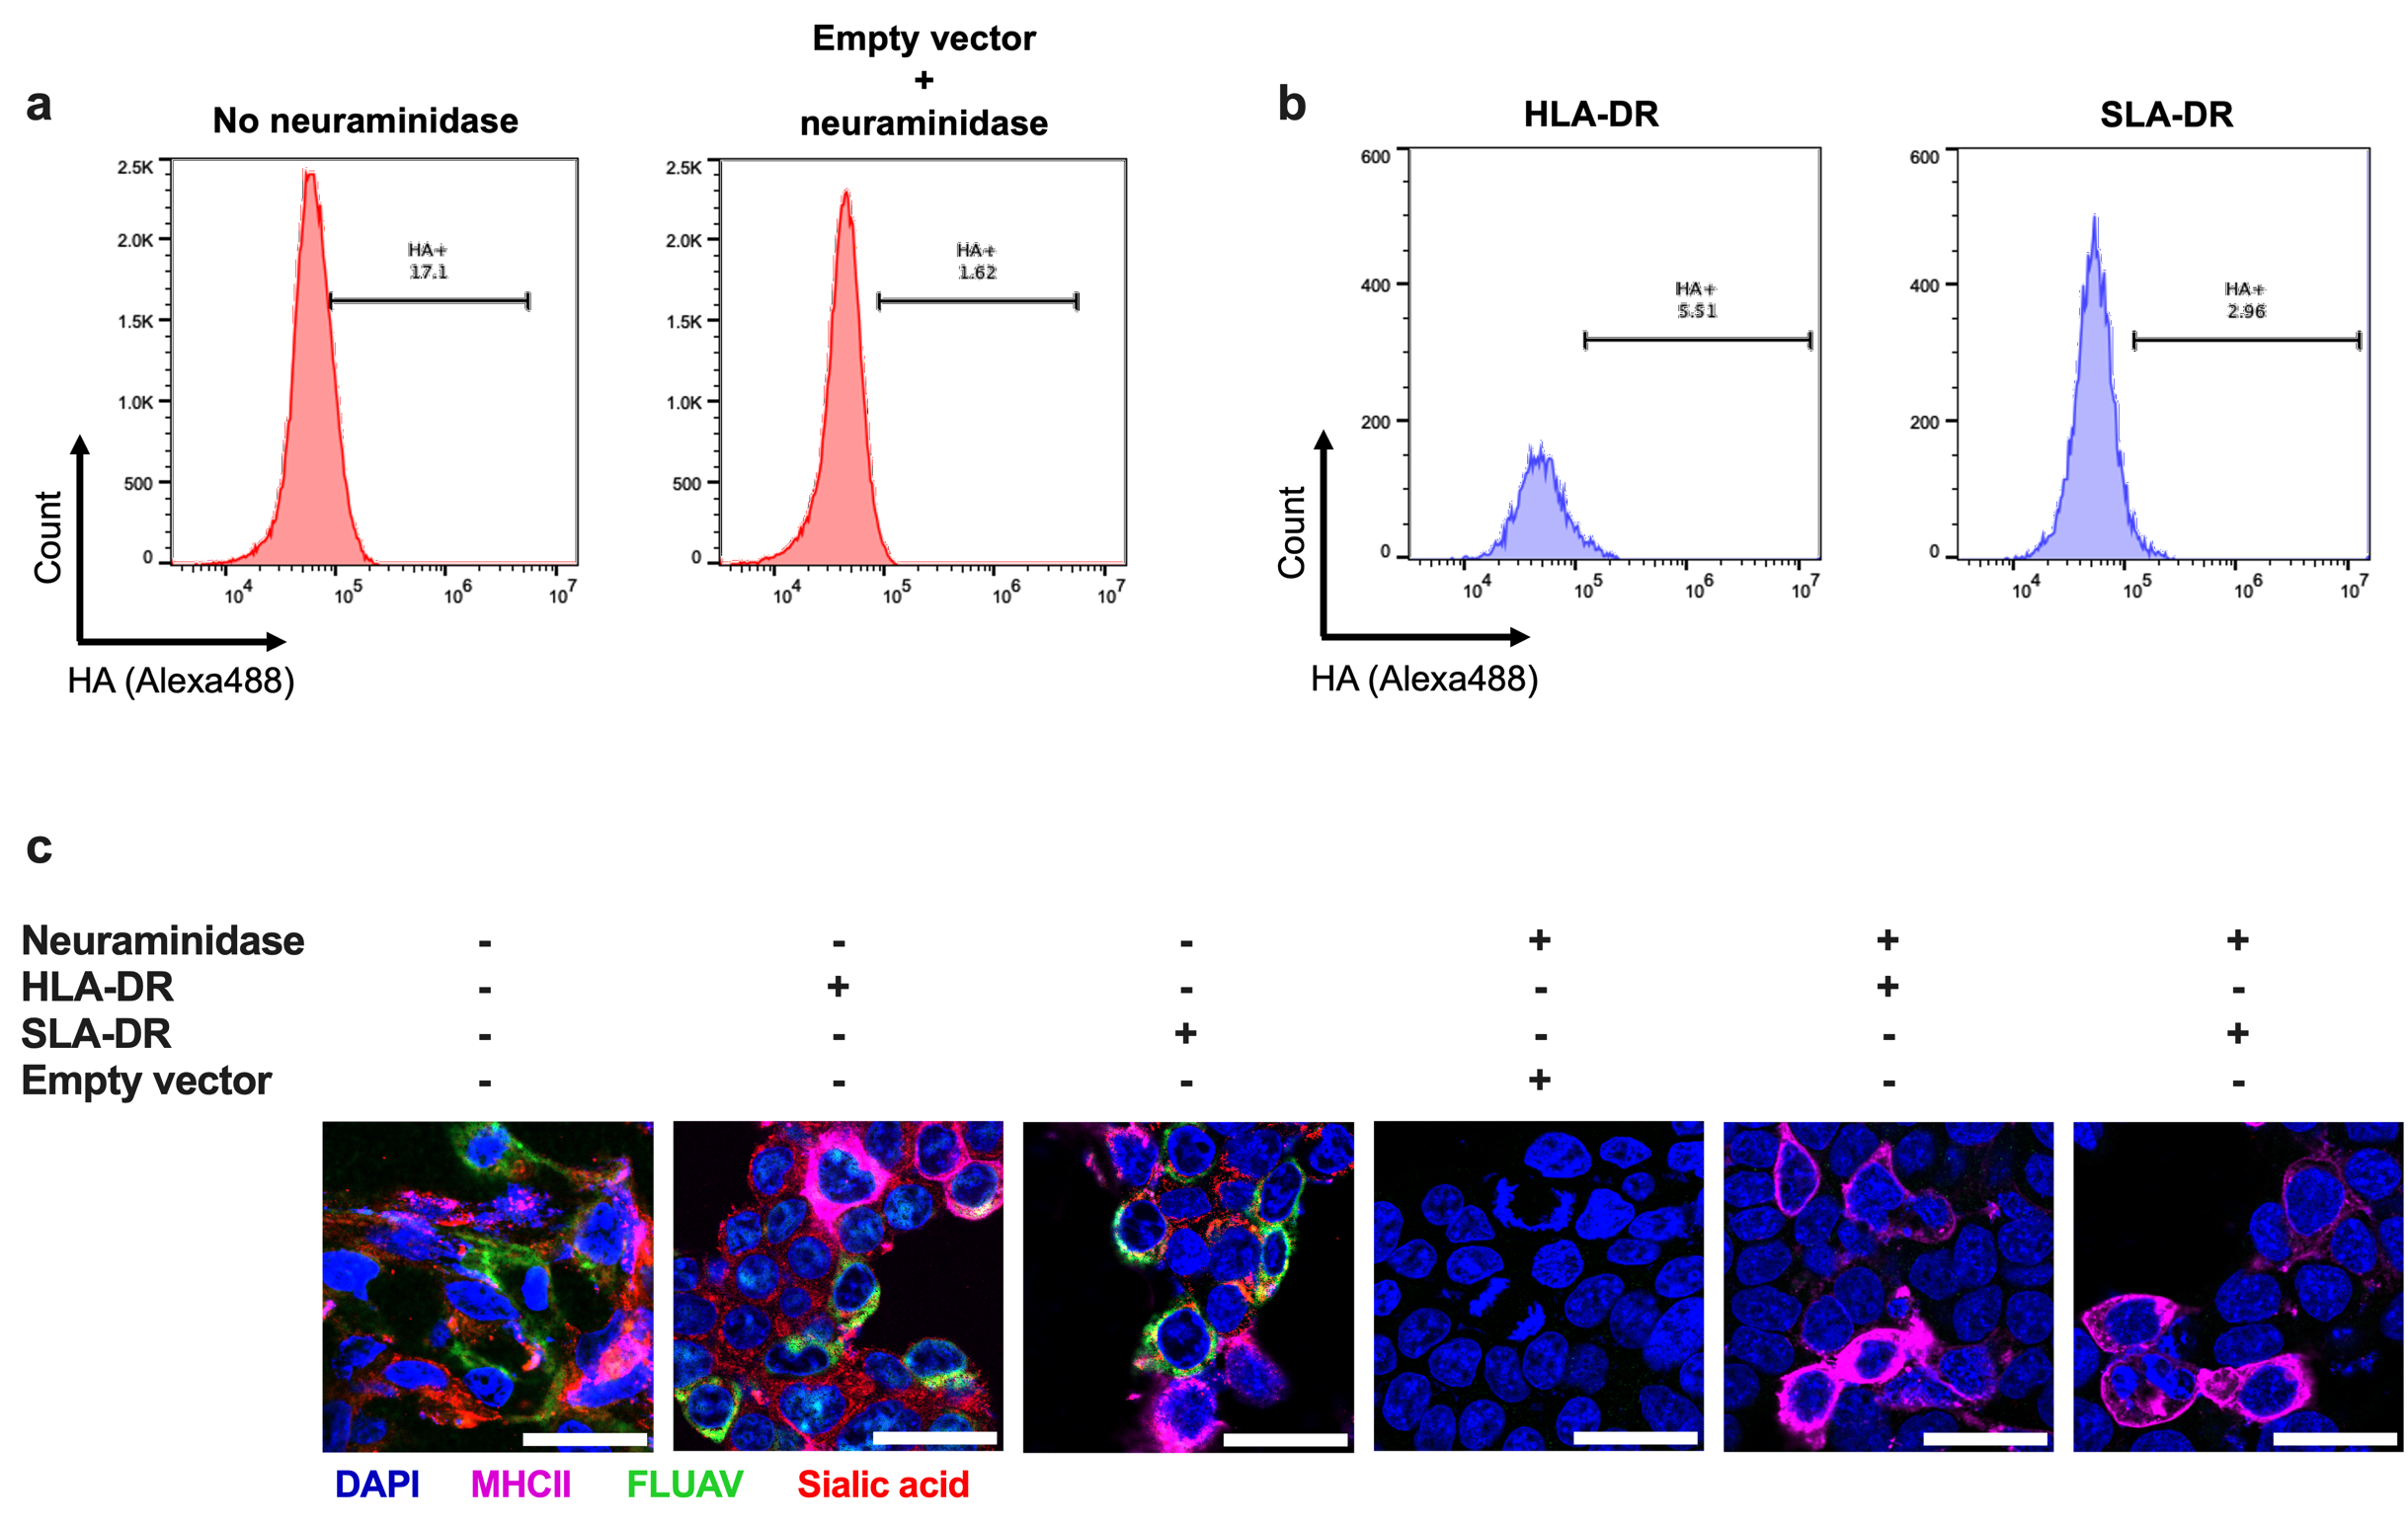


**Supplementary Fig 6. Neuraminidase treatment coupled with lectin incubation abolishes hVIC/11 and sOH/04 in A549 cells.**


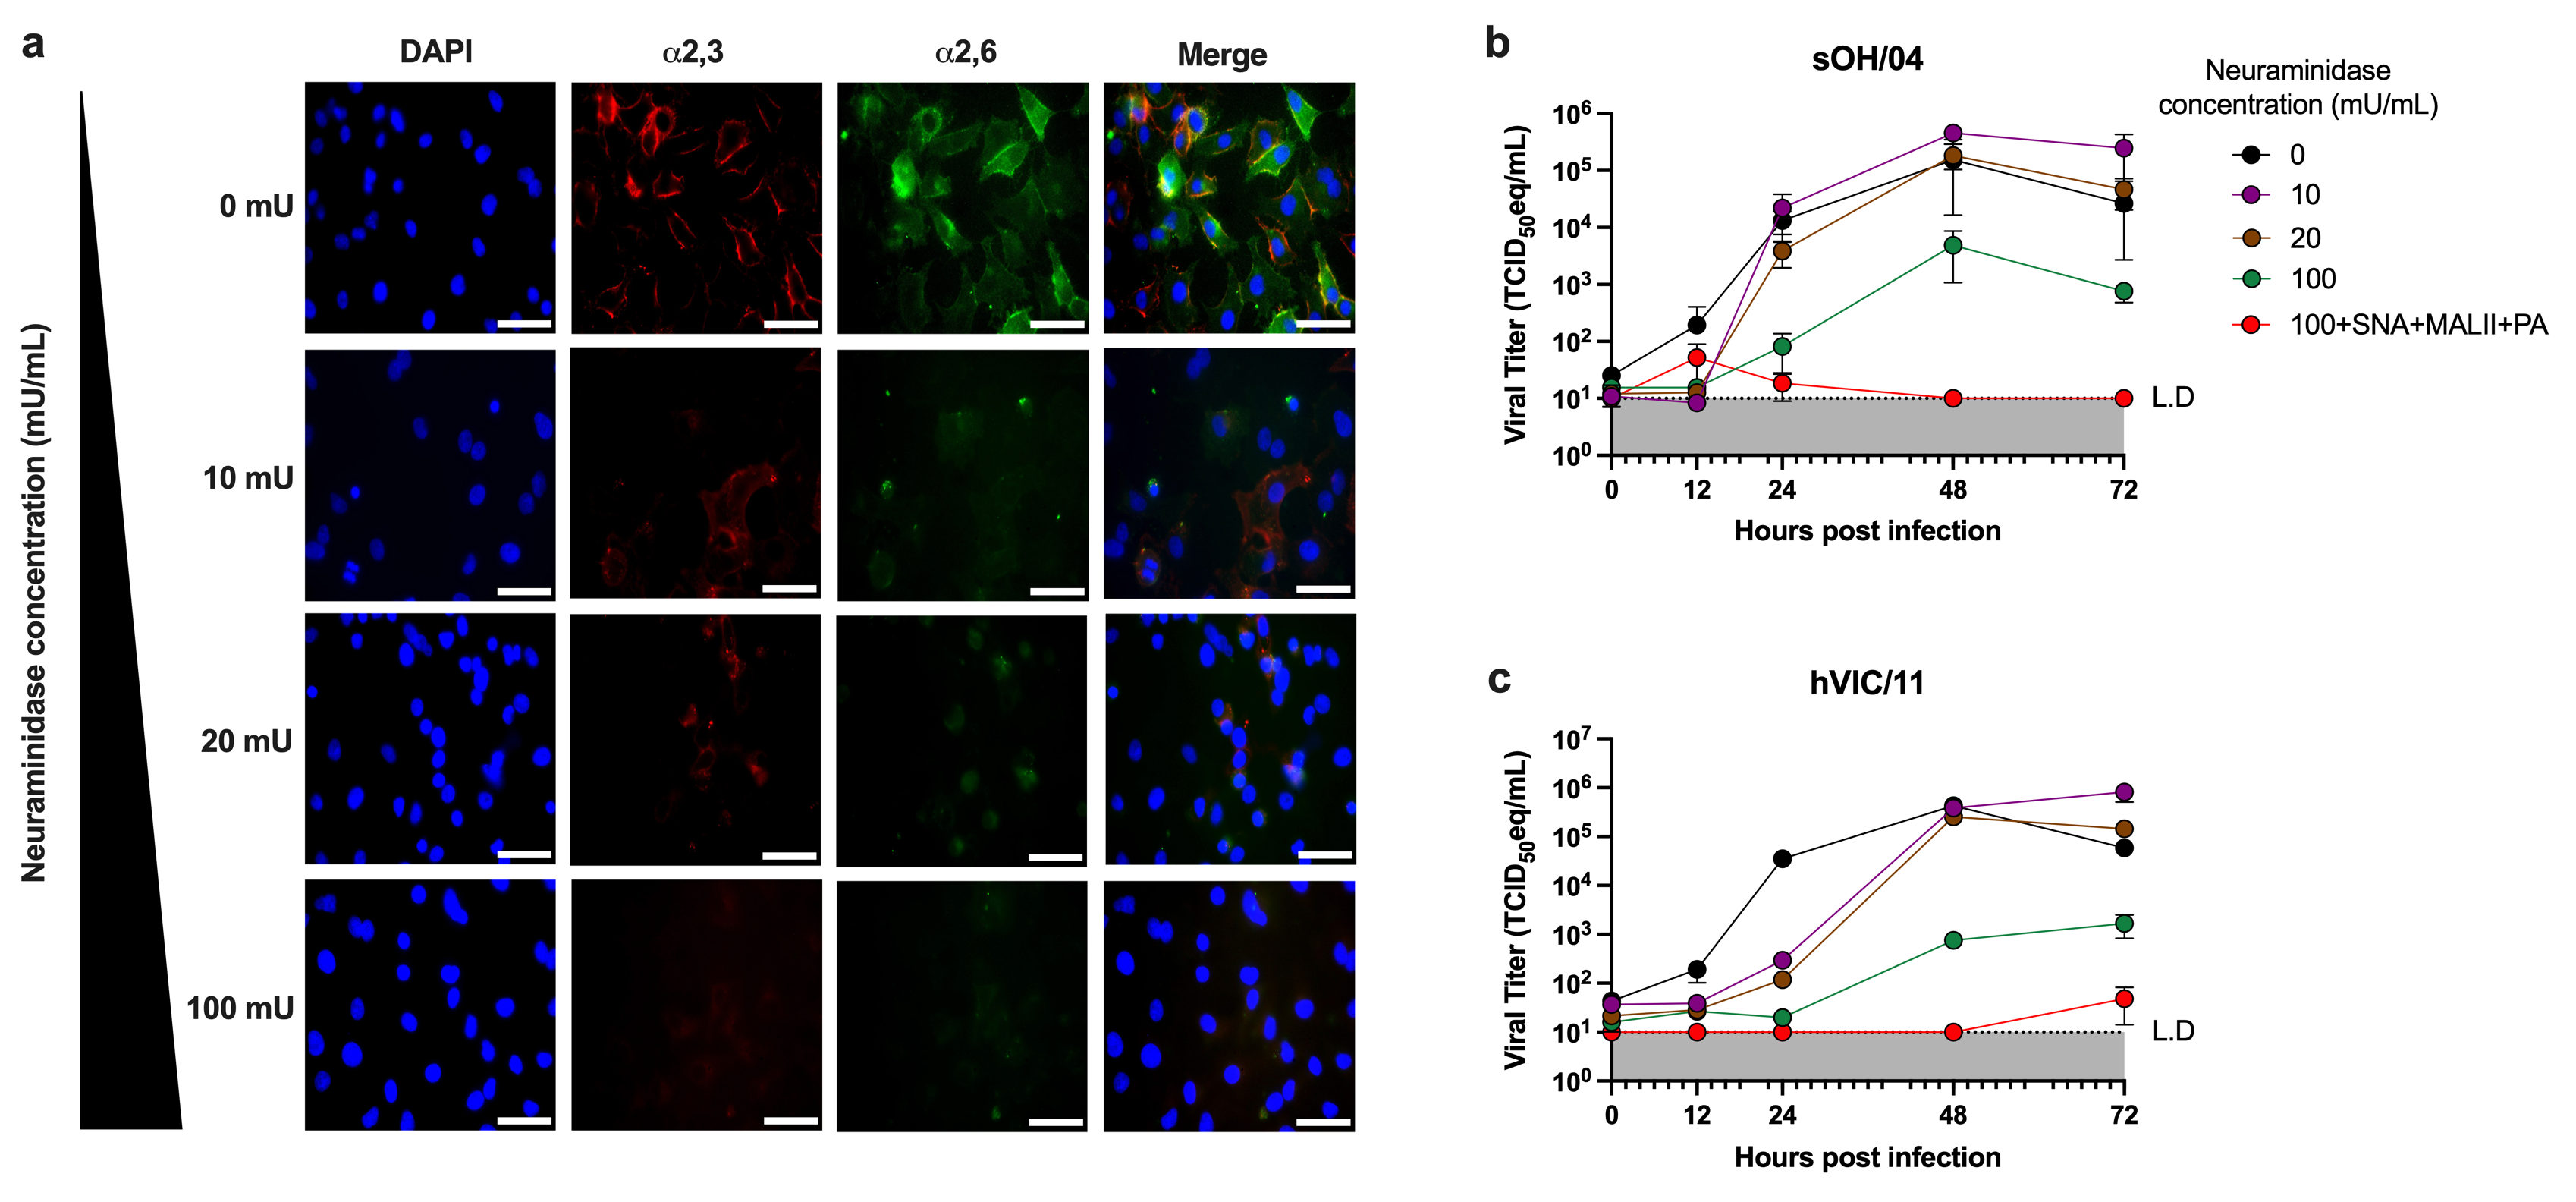


**Supplementary Fig 7. Gating strategy used for MHCII and FLUAV-infected cells detection.**


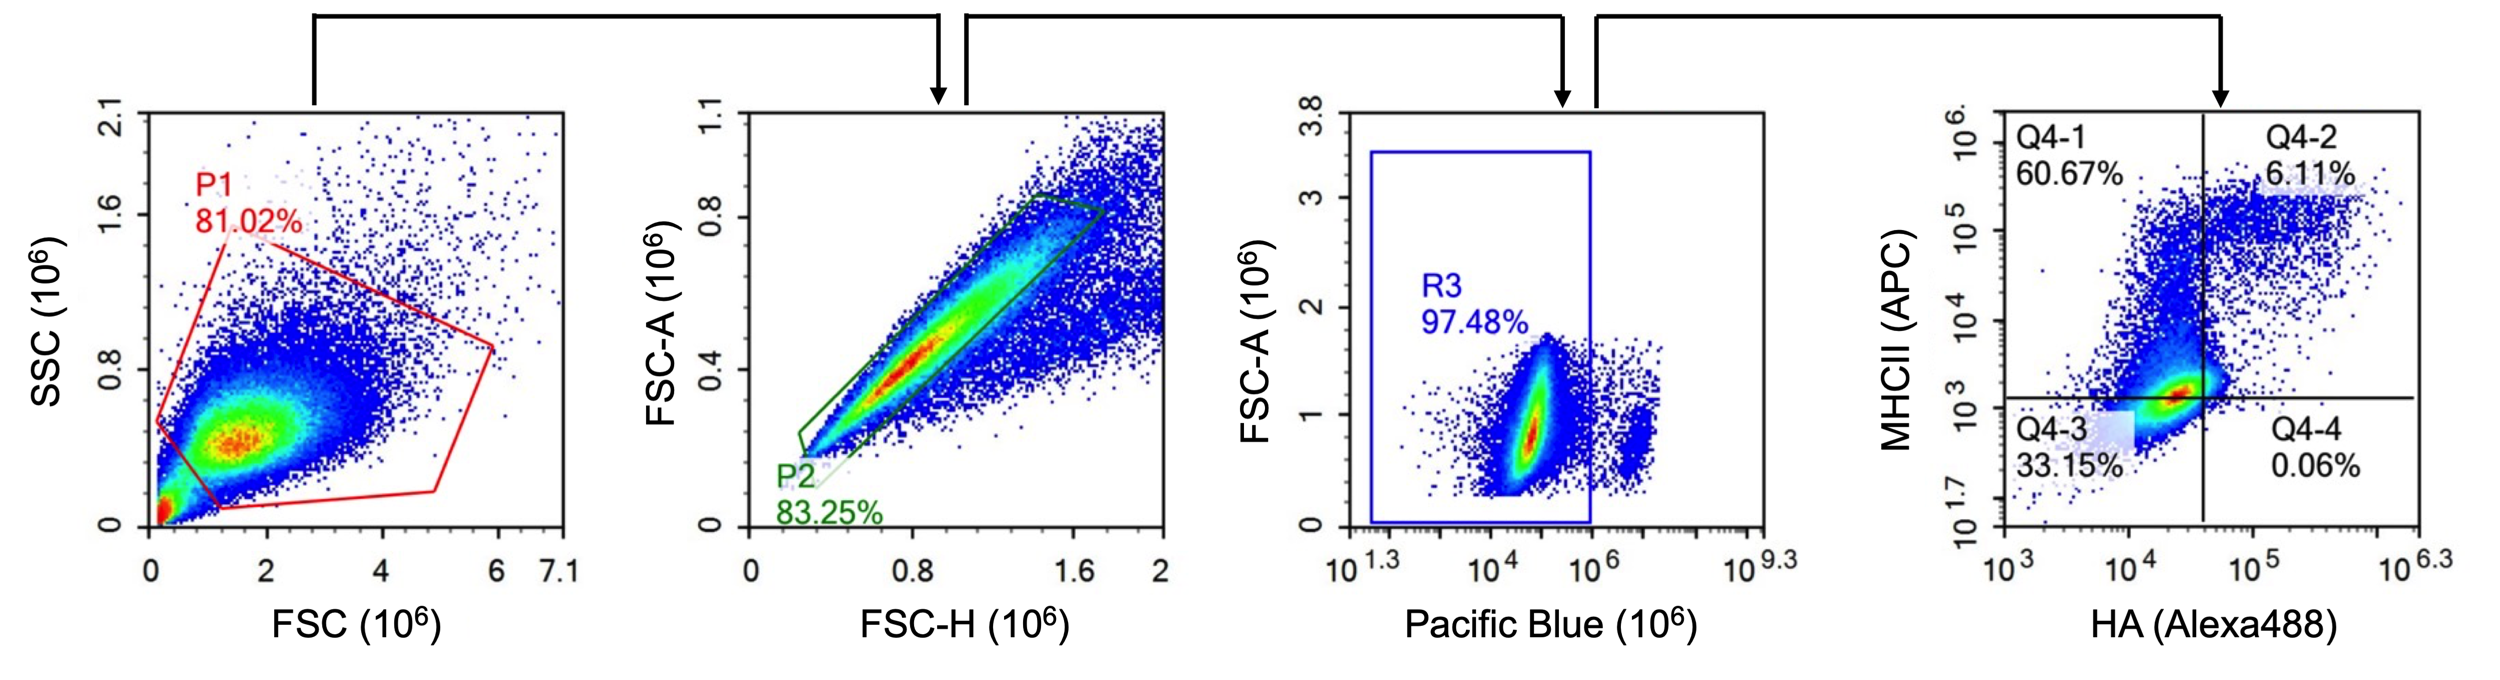

Supplement: Supplementary file 1 [file 8055a0568ad999ec5207697b.docx]
